# Supplementary material
Source: publisher figshare collection journal article supplement (https://rs.figshare.com/ndownloader/files/13440071)
Supplement: Supplementary file 1 [file 13440071]

species	nbrood	avgbrood	minbrood	maxbrood	pmult	avgsire	minsire	maxsire
Arctic fox, Vulpes lagopus	8	5.4			0.125	1.1	1	2
Ethiopian wolf, Canis simensis	12	4.7			0.333	1.3	1	2
African wild dog, Lycaon pictus	6	4.2			0.167	1.2	1	2
Gray fox, Urocyon cinereoargenteus	7	3.3	2	5	0.143	1.1	1	2
Red fox, Vulpes vulpes	12	3.8	2	8	0.5	1.8	1	4
Cheetah, Acinonyx jubatus	23	3	2	5	0.435	1.5	1	3
Domestic cat, Felis catus	92	3.8			0.554	1.8	1	5
Spotted hyena, Crocuta crocuta	102	2			0.333	1.3	1	2
Striped hyena, Hyaena hyaena	4	2.5	2	3	0.5	1.5	1	2
Wolverine, Gulo gulo	43	2.1	2	3	0	1	1	1
Eurasian badger, Meles meles	174	2	2	4	0.396	1.4	1	4
Ermine, Mustela erminea	5	8.4	3	11	0.2	1.2	1	2
American mink, Neovison vison	5	3.6	2	6	0.6	1.6	1	2
Guadeloupe racoon, Procyon lotor	8	4	3	6	0.875	1.9	1	2
American black bear, Ursus americanus	5	2.4			0.2	1.2	1	2
Brown bear, Ursus arctos	69	2			0.145	1.1	1	2
North American Beaver, Castor canadensis	9	3.7			0.556	1.6	1	2
Brazilian guinea pig, Cavia aperea	15	3.9			0.267	1.3	1	2
Prairie vole, Microtus ochrogaster	9	4.8	3	6	0.556	1.6	1	2
Tundra vole, Microtus oeconomus	21	5.3			0.381	1.6	1	3
Red-backed vole, Myodes rutilus	215	4.3			0.232	1.2	1	3
Big-eared woodrat, Neotoma macrotis	25	2.2	2	3	0.2	1.2	1	2
Canyon mouse, Peromyscus crinitus	10	3.8	3	5	0.2	1.2	1	2
Striped field mouse, Apodemus agrarius	44	6.5	5	10	0.636	1.8	1	3
Yellow-necked field mouse, Apodemus flavicollis	35	5			0.514	1.5	1	2
Wood mouse, Apodemus sylvaticus	28	4.7	4	6	0.643	1.7	1	3
Ural field mouse, Apodemus uralensis	46	5			0.435	1.4	1	2
Natal multimammate mouse, Mastomys natalensis	36	9.9	3	16	0.67	1.9	1	4
House mouse, Mus musculus	143	5.6			0.203	1.2	1	2
Red squirrel, Tamiasciurus hudsonicus	44	3			0.727	2	1	4
Alpine marmot, Marmota marmota	68	3.5			0.265	1.3	1	2
Columbian ground squirrel, Urocitellus columbianus	147	3	1	7	0.578	1.8	1	4
Pronghorn, Antilocapra smericana	25	2	1	2	0.44	1.4	1	2
Mouflon, Ovis aries	80	2	1	2	0.738	1.7	1	2
Roe deer, Capreolus capreolus	33	2.1	2	3	0.155	1.2	1	2
White-tailed deer, Odocoileus virginianus	27	2.1	2	3	0.259	1.3	1	2
Wild boar, Sus scrofa	30	4.5	2	7	0.1	1.1	1	2
White-toothed shrew, Crocidura russula	42	2.3			0	1	1	1
Asian lesser wihte-toothed shrew, Crocidura shantungensis	18	3	2	4	0.277	1.3	1	2
Big brown bat, Eptesicus fuscus	26	2			0.462	1.5	1	2
Western European hedgehog, Erinaceus europaeus	5	5	4	7	0.4	1.4	1	2
Snowshoe hare, Lepus americanus	16	4			0.25	1.3	1	2
Gray mouse lemur, Microcebus murinus	26	2			0.654	1.7	1	3
Large treeshrew, Tupaia tana	9	2			0.333	1.3	1	2
Stuart's antechinus, Antechinus stuartii	39	4.4	2	8	0.923	2.8	1	4
Agile antechinus, Antechinus agilis	47	7.7	3	10	0.978	2.8	1	4
Virginia opossum, Didelphis virginiana	64	8.7			0.406	1.4	1	3
Spotted-tailed quoll, Dasyurus maculatus	6	5	2	6	0.667	1.8	1	3
Honey possum, Tarsipes rostratus	5	2.4	2	4	1	2	2	2
Round-tailed ground squirrel, Xerospermophilus tereticaudus	31	4.1	1	13	0.548	2.5	1	7
Southern flying squirrel, Glaucomys volans	22	3.4	1	6	0.909
Columbian ground squirrel, Urocitellus columbianus	29	2.8			0.724	1.9
Woodchuck, Marmota monax	26	3.5			0.631	1.8	1	4
Richardson's ground squirrel, Urocitellus richardsonii	15	5.7			0.8	2.1
House mouse, Mus musculus	146	4.1	1	12	0.336	1.4	1	4
Eastern chipmunk, Tamias straitus	43	2.8	2		0.86	2.5	1	4
Cape dune mole rat, Bathyergus suillus	19	2.7	2	4	0.263	1.3	1	2
Brandt's vole, Lasiopodomys brandtii	27	7.1	3	9	0.458	1.5	1	2
Silvery mole rat, Heliophobius argenteocinereus	11	3.5	3	5	0.091	1.1	1	2
Swamp antechinus, Antechinus minimus	10	6.1	2	8	0.8	2	1	3
Mexican ground squirrel, Ictidomys parvidens	13	5.2			1
White-tailed deer, Odocoileus virginianus	27	2	1	2	0.37	1.4	1	2
